# Supplementary material for: Sensory Information Modulates Voluntary Movement in an Individual with a Clinically Motor- and Sensory-Complete Spinal Cord Injury: A Case Report
Source: MDPI journal article supplement (doi:10.3390/jcm12216875), 2023-10-31
Supplement: s1 [file s1]

# ISNCSCI Scores

## Baseline

|      | RIGHT |         |     |         | LEFT |       |  |
|------|-------|---------|-----|---------|------|-------|--|
|      | MOTOR | SENSORY |     | SENSORY |      | MOTOR |  |
|      |       | LTR     | PPR | LTL     | PPL  |       |  |
| C2   |       | 2       | 2   | 2       | 2    |       |  |
| C3   |       | 2       | 2   | 2       | 2    |       |  |
| C4   |       | 1       | 0   | 1       | 1    |       |  |
| C5   | 0     | 0       | 0   | 0       | 0    | 0     |  |
| C6   | 0     | 0       | 0   | 0       | 0    | 0     |  |
| C7   | 0     | 0       | 0   | 0       | 0    | 0     |  |
| C8   | 0     | 0       | 0   | 0       | 0    | 0     |  |
| T1   | 0     | 0       | 0   | 0       | 0    | 0     |  |
| T2   |       | 0       | 0   | 0       | 0    |       |  |
| T3   |       | 1       | 0   | 0       | 0    |       |  |
| T4   |       | 0       | 0   | 0       | 0    |       |  |
| T5   |       | 0       | 0   | 0       | 0    |       |  |
| T6   |       | 0       | 0   | 0       | 0    |       |  |
| T7   |       | 0       | 0   | 1       | 0    |       |  |
| T8   |       | 0       | 0   | 0       | 0    |       |  |
| T9   |       | 0       | 0   | 0       | 0    |       |  |
| T10  |       | 0       | 0   | 0       | 0    |       |  |
| T11  |       | 0       | 0   | 0       | 0    |       |  |
| T12  |       | 0       | 0   | 0       | 0    |       |  |
| L1   |       | 0       | 0   | 0       | 0    |       |  |
| L2   | 0     | 0       | 0   | 0       | 0    | 0     |  |
| L3   | 0     | 0       | 0   | 0       | 0    | 0     |  |
| L4   | 0     | 0       | 0   | 0       | 0    | 0     |  |
| L5   | 0     | 0       | 0   | 0       | 0    | 0     |  |
| S1   | 0     | 0       | 0   | 0       | 0    | 0     |  |
| S2   |       | 0       | 0   | 0       | 0    |       |  |
| S3   |       | 0       | 0   | 0       | 0    |       |  |
| S4-5 |       | 0       | 0   | 0       | 0    |       |  |
|      | 0     | 6       | 4   | 8       | 5    | 0     |  |

Voluntary Anal Contraction: N

Deep Anal Pressure: N

## 7 months prior to Baseline

|      | RIGHT |         |     |         | LEFT |   | MOTOR |
|------|-------|---------|-----|---------|------|---|-------|
|      | MOTOR | SENSORY |     | SENSORY |      |   |       |
|      |       | LTR     | PPR | LTL     | PPL  |   |       |
| C2   |       | 2       | 2   | 2       | 2    |   |       |
| C3   |       | 2       | 2   | 2       | 2    |   |       |
| C4   |       | 2       | 2   | 2       | 2    |   |       |
| C5   | 0     | 1       | 0   | 0       | 0    | 0 |       |
| C6   | 0     | 0       | 0   | 0       | 0    | 0 |       |
| C7   | 0     | 0       | 0   | 0       | 0    | 3 |       |
| C8   | 0     | 0       | 0   | 0       | 0    | 0 |       |
| T1   | 0     | 0       | 0   | 0       | 0    | 0 |       |
| T2   |       | 0       | 0   | 0       | 0    |   |       |
| T3   |       | 0       | 0   | 0       | 0    |   |       |
| T4   |       | 0       | 0   | 0       | 0    |   |       |
| T5   |       | 0       | 0   | 0       | 0    |   |       |
| T6   |       | 0       | 0   | 0       | 0    |   |       |
| T7   |       | 0       | 0   | 0       | 0    |   |       |
| T8   |       | 0       | 0   | 0       | 0    |   |       |
| T9   |       | 0       | 0   | 0       | 0    |   |       |
| T10  |       | 0       | 0   | 0       | 0    |   |       |
| T11  |       | 0       | 0   | 0       | 0    |   |       |
| T12  |       | 0       | 0   | 0       | 0    |   |       |
| L1   |       | 0       | 0   | 0       | 0    |   |       |
| L2   | 0     | 0       | 0   | 0       | 0    | 0 |       |
| L3   | 0     | 0       | 0   | 0       | 0    | 2 |       |
| L4   | 0     | 0       | 0   | 0       | 0    | 0 |       |
| L5   | 0     | 0       | 0   | 0       | 0    | 0 |       |
| S1   | 1     | 0       | 0   | 0       | 0    | 1 |       |
| S2   |       | 0       | 0   | 0       | 0    |   |       |
| S3   |       | 0       | 0   | 0       | 0    |   |       |
| S4-5 |       | 0       | 0   | 0       | 0    |   |       |
|      | 1     | 8       | 6   | 6       | 6    | 6 |       |

Voluntary Anal Contraction: N

Deep Anal Pressure: N

## 3 months prior to baseline

|      | RIGHT |         |     |         | LEFT |       |  |
|------|-------|---------|-----|---------|------|-------|--|
|      | MOTOR | SENSORY |     | SENSORY |      | MOTOR |  |
|      |       | LTR     | PPR | LTL     | PPL  |       |  |
| C2   |       | 2       | 2   | 2       | 2    |       |  |
| C3   |       | 2       | 2   | 2       | 2    |       |  |
| C4   |       | 1       | 1   | 1       | 1    |       |  |
| C5   | 0     | 0       | 0   | 0       | 0    | 0     |  |
| C6   | 0     | 0       | 0   | 0       | 0    | 0     |  |
| C7   | 2     | 0       | 0   | 0       | 0    | 1     |  |
| C8   | 0     | 0       | 0   | 0       | 0    | 0     |  |
| T1   | 0     | 0       | 0   | 0       | 0    | 0     |  |
| T2   |       | 0       | 0   | 0       | 0    |       |  |
| T3   |       | 0       | 0   | 0       | 0    |       |  |
| T4   |       | 0       | 0   | 0       | 0    |       |  |
| T5   |       | 0       | 0   | 0       | 0    |       |  |
| T6   |       | 0       | 0   | 0       | 0    |       |  |
| T7   |       | 0       | 0   | 0       | 0    |       |  |
| T8   |       | 0       | 0   | 0       | 0    |       |  |
| T9   |       | 0       | 0   | 0       | 0    |       |  |
| T10  |       | 0       | 0   | 0       | 0    |       |  |
| T11  |       | 0       | 0   | 0       | 0    |       |  |
| T12  |       | 0       | 0   | 0       | 0    |       |  |
| L1   |       | 0       | 0   | 0       | 0    |       |  |
| L2   | 0     | 0       | 0   | 0       | 0    | 0     |  |
| L3   | 0     | 0       | 0   | 0       | 0    | 1     |  |
| L4   | 0     | 0       | 0   | 0       | 0    | 0     |  |
| L5   | 0     | 0       | 0   | 0       | 0    | 0     |  |
| S1   | 1     | 0       | 0   | 0       | 0    | 1     |  |
| S2   |       | 0       | 0   | 0       | 0    |       |  |
| S3   |       | 0       | 0   | 0       | 0    |       |  |
| S4-5 |       | 0       | 0   | 0       | 0    |       |  |
|      | 3     | 5       | 5   | 5       | 5    | 3     |  |

Voluntary Anal Contraction: N

Deep Anal Pressure: N
